# Supplementary figures and images for: Identifying repeat domains in large genomes
Source: Springer Nature journal article supplement (doi:10.1186/gb-2006-7-1-r7), 2006-01-31

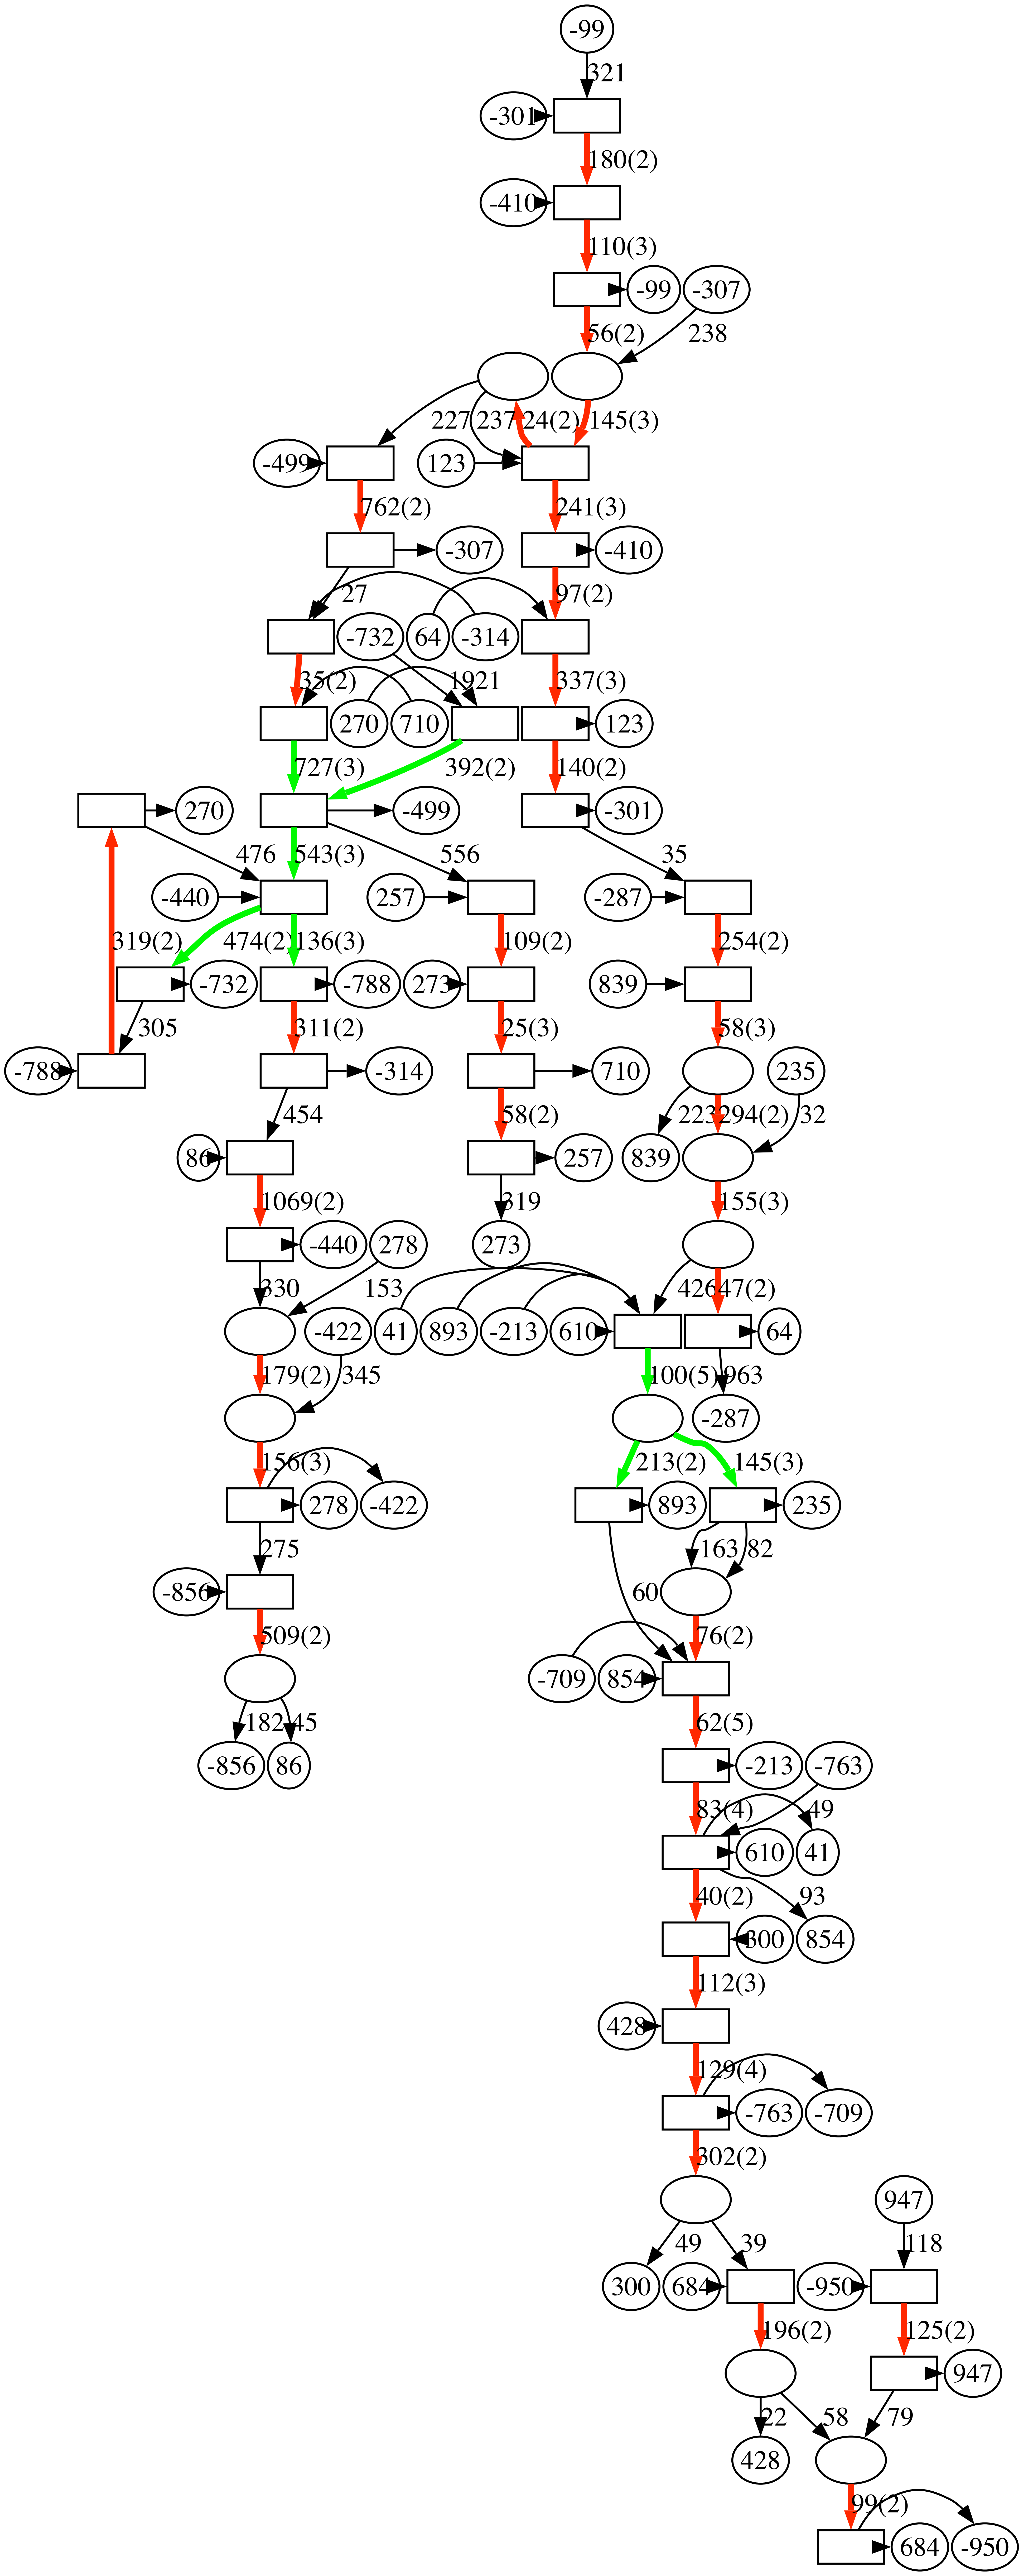

Supplement: Additional file 3 [file gb-2006-7-1-r7-s3.pdf]
